# Supplementary material
Source: PubMed Central journal article supplement (PMC3082981)
Supplement: nn200320b_si_001.pdf [file nn200320b_si_001.pdf]

# Dynamic control of nanoprecipitation in a nanopipette

*Boaz Vilozy,<sup>1,2</sup> Paolo Actis,<sup>1,3</sup> R. Adam Seger,<sup>1,2</sup> Nader Pourmand<sup>1\*</sup>*

<sup>1</sup>Department of Biomolecular Engineering, University of California Santa Cruz, 1156 High Street, Santa Cruz, CA 95064, USA

<sup>2</sup>Advanced Studies Laboratories, UC Santa Cruz and NASA Ames Research Center, Moffett Field, California 94035

<sup>3</sup>Department of Biology, Texas Southern University, 3100 Cleburne Street, Houston, TX 77004, USA

E-mail: [pourmand@soe.ucsc.edu](mailto:pourmand@soe.ucsc.edu)

## ONLINE SUPPORTING INFORMATION

**Fig. S1. Voltage threshold for ion current blockage.**

**Fig. S2. Current blockage in a poly-L-lysine (PLL) coated pipette.**

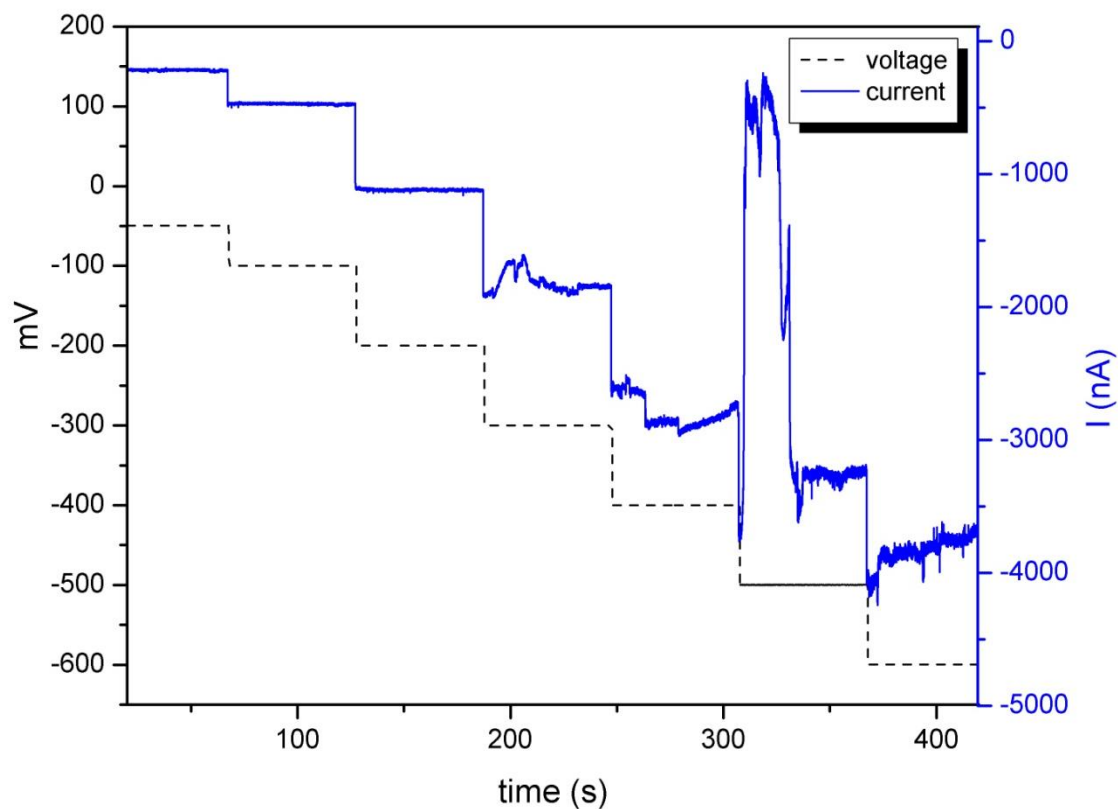

**Fig. S1. Voltage threshold for ion current blockage.** Increasing voltage of negative potential was applied to a pipette filled with buffer (Tris-HCl, pH 7) and placed in a bath of phosphate buffer (pH 7). A threshold at -300 mV can be seen for ion current blockage due to nanoprecipitation.

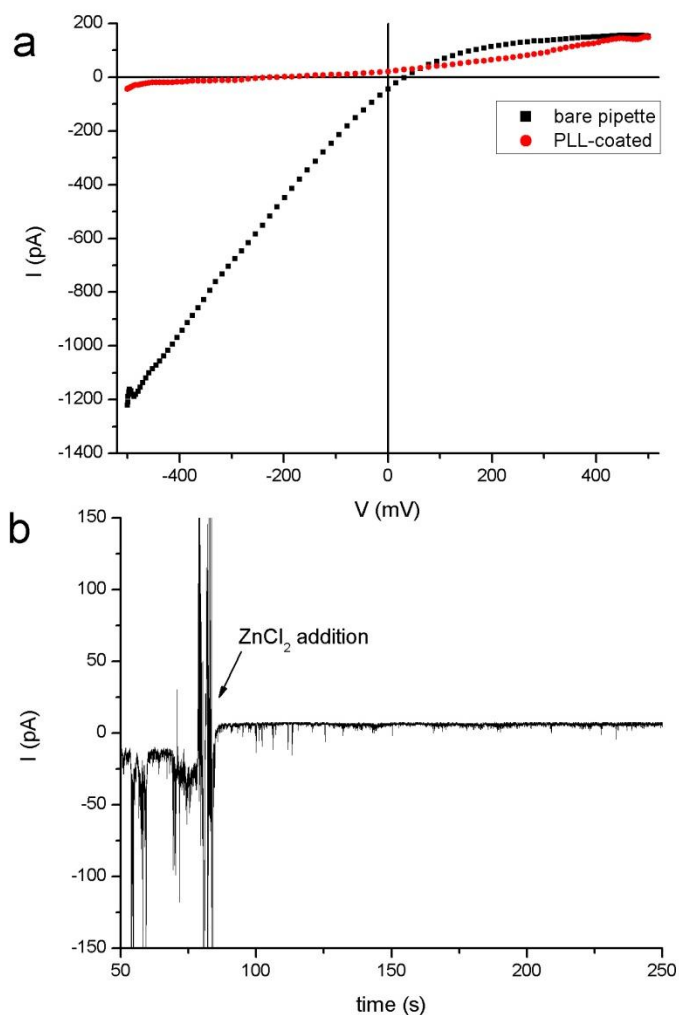

**Fig. S2. Current blockage in a poly-L-lysine (PLL) coated pipette.** **a**, rectification in a bare pipette (black squares) and a PLL-coated pipette (red circles). The PLL was adsorbed to the surface by dipping in a PLL-solution (10 ppm) and followed by immersion in buffer, where the positively rectified signal was stable over 5 minutes. **b**, while applying a potential of -500 mV to the positively rectified pipette, an aliquot of zinc chloride was added to give a concentration of 0.02 mM in the bath. The pipette contained pH 7 phosphate buffer and was immersed in pH 7 Tris buffer.
